1 **Fungal LysM effectors that comprise two LysM domains bind**  
2 **chitin through intermolecular dimerization**

3

4 **Hui Tian<sup>1</sup>, Gabriel L. Fiorin<sup>1</sup>, Anja Kombrink<sup>1</sup>, Jeroen R. Mesters<sup>2,\*</sup>, Bart P.H.J.**

5 **Thomma<sup>1,3,\*</sup>**

6

7 <sup>1</sup>Laboratory of Phytopathology, Wageningen University and Research,

8 Droevendaalsesteeg 1, 6708PB Wageningen, The Netherlands; <sup>2</sup>Institute of

9 Biochemistry, University of Lübeck, Ratzeburger Allee 160, 23538 Lübeck, Germany;

10 <sup>3</sup>University of Cologne, Institute for Plant Sciences, Cluster of Excellence on Plant

11 Sciences (CEPLAS), 50674 Cologne, Germany.

12

13 \*To whom correspondence should be addressed. E-mail: [bart.thomma@wur.nl](mailto:bart.thomma@wur.nl)

14 **SUMMARY**

15 Chitin is a polymer of  $\beta$ -(1,4)-linked *N*-acetyl-D-glucosamine (GlcNAc) and a major  
16 structural component of fungal cell walls that acts as a microbe-associated molecular  
17 pattern (MAMP) that can be recognized by plant cell surface-localized pattern  
18 recognition receptors (PRRs) to activate a wide range of immune responses. In order to  
19 deregulate chitin-induced plant immunity and successfully establish their infection,  
20 many fungal pathogens secrete effector proteins with LysM domains. We previously  
21 determined that two of the three LysM domains of the LysM effector Ecp6 from the  
22 tomato leaf mould fungus *Cladosporium fulvum* cooperate to form a chitin-binding  
23 groove that binds chitin with ultra-high affinity, allowing to outcompete host PRRs for  
24 chitin binding. In this study, we describe functional and structural analyses aimed to  
25 investigate whether LysM effectors that contain two LysM domains bind chitin through  
26 intramolecular or intermolecular LysM dimerization. To this end, we focus on MoSlp1  
27 from the rice blast fungus *Magnaporthe oryzae*, Vd2LysM from the broad host range  
28 vascular wilt fungus *Verticillium dahliae*, and ChElp1 and ChElp2 from the Brassicaceae  
29 anthracnose fungus *Colletotrichum higginsianum*. We show that these LysM effectors  
30 bind chitin through intermolecular LysM dimerization, allowing the formation of  
31 polymeric complexes that may precipitate in order to eliminate the presence of chitin  
32 oligomers at infection sites to suppress activation of chitin-induced plant immunity. In  
33 this manner, many fungal pathogens are able to subvert chitin-triggered immunity in  
34 their plant hosts.

## 35 INTRODUCTION

36 Chitin is a homopolymer of  $\beta$ -(1,4)-linked *N*-acetyl-D-glucosamine (GlcNAc) and a major  
37 structural component of fungal cell walls (Free, 2013; Lenardon *et al.*, 2010).  
38 Additionally, chitin has been characterized as a fungal microbe-associated molecular  
39 pattern (MAMP) that can be recognized by plant cell surface-localized pattern  
40 recognition receptors that contain extracellular LysM domains (LysM-PRRs) (Rovenich  
41 *et al.*, 2016; Sanchez-Vallet *et al.*, 2015; Zhang *et al.*, 2007; Zipfel, 2008). Upon  
42 recognition of chitin by such receptors, plants evoke a broad range of immune responses  
43 including the production of reactive oxygen species (ROS), the activation of mitogen-  
44 associated protein kinases (MAPKs), the generation of ion fluxes and the expression of  
45 defence-related genes that include those encoding hydrolytic enzymes such as chitinases  
46 in order to halt fungal invasion (Altenbach and Robatzek, 2007; Boller and Felix, 2009;  
47 Felix *et al.*, 1993; Jones and Dangl, 2006; Sanchez-Vallet *et al.*, 2015). LysM-PRRs have  
48 been functionally characterized in several plants, including the model plant *Arabidopsis*  
49 (*Arabidopsis thaliana*) in which the LysM receptor AtLYK5 binds chitin with high affinity  
50 (1.72  $\mu$ M) and recruits AtLYK4 and AtCERK1 upon chitin elicitation to form a tripartite  
51 receptor complex to initiate chitin signalling (Cao *et al.*, 2014). AtCERK1 was found to  
52 bind chitin directly as well, albeit with approximately 200-fold lower affinity than  
53 AtLYK5 (Cao *et al.*, 2014; Miya *et al.*, 2007; Petutschnig *et al.*, 2010). Moreover, a crystal  
54 structure of the ectodomain of AtCERK1 revealed that only one out of its three LysMs  
55 (LysM2) binds chitin (Liu *et al.*, 2012).

56 To avoid chitin-induced immune responses, successful fungal pathogens evolved  
57 various strategies to either protect fungal cell wall chitin against hydrolysis by host  
58 enzymes, or prevent the activation of plant immunity by fungal cell wall-derived chitin  
59 oligomers (de Jonge *et al.*, 2010; Rovenich *et al.*, 2014; Sanchez-Vallet *et al.*, 2015). A

60 well-studied fungus for which several strategies to deal with chitin-triggered immunity  
61 have been characterized is *Cladosporium fulvum*, the fungus that causes leaf mould  
62 disease of tomato. *C. fulvum* secretes the Ecp6 effector protein during host colonization,  
63 which contains three LysMs and binds chitin oligosaccharides with ultra-high affinity, to  
64 prevent the activation of chitin-induced plant immune responses (Bolton *et al.*, 2008; de  
65 Jonge *et al.*, 2010). A crystal structure of Ecp6 revealed that two of its three LysMs  
66 cooperate to form a composite chitin-binding groove that binds chitin through  
67 intrachain LysM dimerization (Sanchez-Vallet *et al.*, 2013). The genome of another host-  
68 specific fungus, *Zymoseptoria tritici*, the causal agent of Septoria tritici blotch (STB) of  
69 wheat, encodes a close homolog of Ecp6 known as Mg3LysM that similarly suppresses  
70 chitin-triggered immunity (Marshall *et al.*, 2011). Additionally, the *Z. tritici* genome  
71 encodes two secreted effectors that carry a single LysM only. Of these, Mg1LysM was  
72 characterized to protect hyphae against hydrolysis by plant chitinases (Marshall *et al.*,  
73 2011). An Mg1LysM crystal structure showed that two Mg1LysM monomers form a  
74 chitin-independent homodimer via the  $\beta$ -sheet that is present in the *N*-terminus of  
75 Mg1LysM (Sánchez-Vallet *et al.*, 2019). Furthermore, Mg1LysM homodimers undergo  
76 ligand-induced polymerization in the presence of chitin, leading to a polymeric structure  
77 that is able to protect fungal cell walls (Sánchez-Vallet *et al.*, 2019). In contrast to Ecp6  
78 and Mg3LysM, Mg1LysM cannot suppress chitin-triggered immune responses in host  
79 plants (Marshall *et al.*, 2011).

80       Suppression of chitin-triggered immunity by secreted fungal effectors that only  
81 carry LysM domains, collectively referred to as LysM effectors, has been demonstrated  
82 for various phytopathogenic fungi by now. For instance, *Magnaporthe oryzae*, the causal  
83 agent of rice blast disease, secretes the LysM effector Slp1 to bind chitin and suppresses  
84 chitin-triggered immune responses (Mentlak *et al.*, 2012). Similarly, the Brassicaceae

85 anthracnose fungus *Colletotrichum higginsianum* secretes Elp1 and Elp2, while the broad  
86 host-range vascular wilt fungus *Verticillium dahliae* secretes Vd2LysM (Kombrink *et al.*,  
87 2017; Takahara *et al.*, 2016). While these examples are from plant-associated  
88 Ascomycete fungi, also plant-associated fungi that belong to other phyla utilize LysM  
89 effectors to suppress chitin-triggered immunity. For instance, the Basidiomycota soil-  
90 borne broad host-range pathogen *Rhizoctonia solani* secretes RsLysM, while the  
91 Glomeromycota arbuscular mycorrhizal fungus *Rhizophagus irregularis* secretes RiSLM  
92 to suppress chitin-triggered immunity (Dolfors *et al.*, 2019; Zeng *et al.*, 2020). The latter  
93 example demonstrates that also non-pathogenic fungi utilize LysM effectors in their  
94 interaction with host plants. Moreover, the finding that LysM effectors contribute to the  
95 virulence of the Ascomycete fungus *Beauveria bassiana* by evasion of immune responses  
96 in insect hosts demonstrates that LysM effectors play roles in fungal interactions beyond  
97 plant hosts (Cen *et al.*, 2017; Kombrink and Thomma, 2013). Intriguingly, almost all  
98 characterized LysM effectors that were shown to suppress chitin-triggered immunity in  
99 plant hosts contain two LysM domains, except for Ecp6 and Mg3LysM that possess three  
100 LysMs, and RiSLM that possesses only one LysM.

101         Based on the functional analysis of *C. fulvum* Ecp6, it has been proposed that the  
102 ability to suppress chitin-triggered immunity resides in the ability to bind chitin with  
103 ultrahigh affinity, such that host chitin receptors can be outcompeted for substrate  
104 binding (Sanchez-Vallet *et al.*, 2013; Sanchez-Vallet *et al.*, 2015). In Ecp6, and most likely  
105 also in Mg3LysM, the ultrahigh affinity is mediated by intramolecular LysM dimerization  
106 of two of the three LysM domains. However, it remains unclear whether LysM effectors  
107 that comprise two LysMs are able to similarly undergo intramolecular LysM  
108 dimerization, which then would allow for ultrahigh chitin-binding affinity. Thus, in order  
109 to understand how these LysM effectors suppress chitin-triggered immunity, we

110 performed functional and structural analysis using several representatives of this group  
111 of LysM effectors, namely MoSlp1 from *M. oryzae*, Vd2LysM from *V. dahliae*, ChElp1 and  
112 ChElp2 from *C. higginsianum*.

113

114

## 115 RESULTS

### 116 Three-dimensional structure prediction of LysM effectors with two LysM domains

117 It has previously been determined that MoSlp1 from *M. oryzae*, Vd2LysM from *V. dahliae*,  
118 and ChElp1 and ChElp2 from *C. higginsianum* contain two LysM domains, bind chitin and  
119 suppress chitin-induced host immunity (Kombrink *et al.*, 2017; Mentlak *et al.*, 2012;  
120 Takahara *et al.*, 2016). Their length varies from a minimum of 145 aa (Vd2LysM) to a  
121 maximum of 176 aa (ChElp2), with the molecular weight of the mature proteins ranging  
122 from 14.24 to 16.14 kDa (Fig. 1A). An amino acid sequence alignment of the LysM  
123 domains of the LysM effectors with two LysM domains with those of *C. fulvum* Ecp6  
124 displayed a significant conservation of the domains, and of the residues involved in  
125 chitin binding in particular (Fig. S1). Structural analysis of Ecp6 has previously revealed  
126 that the first and third LysM domain cooperate to form a composite ultra-high affinity  
127 chitin-binding groove, enabled by a long and flexible linker between these domains  
128 (Sanchez-Vallet *et al.*, 2013). To assess whether intramolecular LysM dimerization could  
129 also occur in MoSlp1, Vd2LysM, ChElp1 and ChElp2, their overall three-dimensional  
130 structure was predicted using two software packages, I-TASSER and Phyre2 (Kelley *et*  
131 *al.*, 2015; Roy *et al.*, 2010; Yang and Zhang, 2015). Interestingly, the predicted three-  
132 dimensional structures by the different methods resulted in protein models with  
133 different substrate-binding possibilities (Fig. 2). The four structures modelled by I-  
134 TASSER are predicted to have confidence (C) scores of -0.92, -0.86, -0.99 and -0.91 for  
135 MoSlp1, Vd2LysM, ChElp1 and ChElp2, respectively on a scale between -5 and 2, where  
136 models with C-scores > -1.5 are considered reliable (Roy *et al.*, 2010). It is important to  
137 note that the surface-areas with amino-acid residues involved in chitin binding are  
138 facing outward in these structures (Fig. 2), and that the linker regions between the two  
139 LysM domains are much more tightly packed and thus do not straightforward permit for

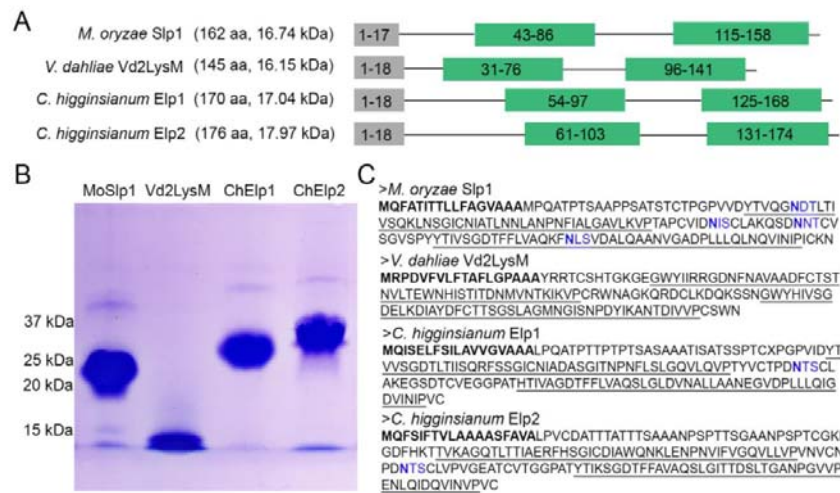

**Fig. 1 Characteristics and heterologous production of four LysM effectors.** (A) Schematic representation of four fungal LysM effectors that contain two LysM domains. Signal peptides (grey boxes) were predicted with SignalP 4.0 (<http://www.cbs.dtu.dk/services/SignalP-4.0/>) and LysM domains (green boxes) with InterPro (<https://www.ebi.ac.uk/interpro/>). The numbers in the boxes indicate the amino acids that compose the motif. (B) Protein polyacrylamide gel electrophoresis of 1 µl of purified and concentrated preparation of the effectors produced in *Pichia pastoris* followed by CBB staining. (C) Primary amino acid sequence of the four LysM effectors with signal peptides in bold, LysMs underlined, and putative *N*-glycosylation sites as predicted with the NetNGlyc 1.0 Server (<http://www.cbs.dtu.dk/services/NetNGlyc/>) in blue. *N*-glycosylation sites are composed of asparagine-X-Serine/Threonine (N-X-S/T) triads, with the asparagines that may be *N*-glycosylated in bold.

140 a structural reorganisation of the two domains to enable intramolecular LysM  
 141 dimerization. In contrast, Phyre2 presents a model where the two LysM domains of



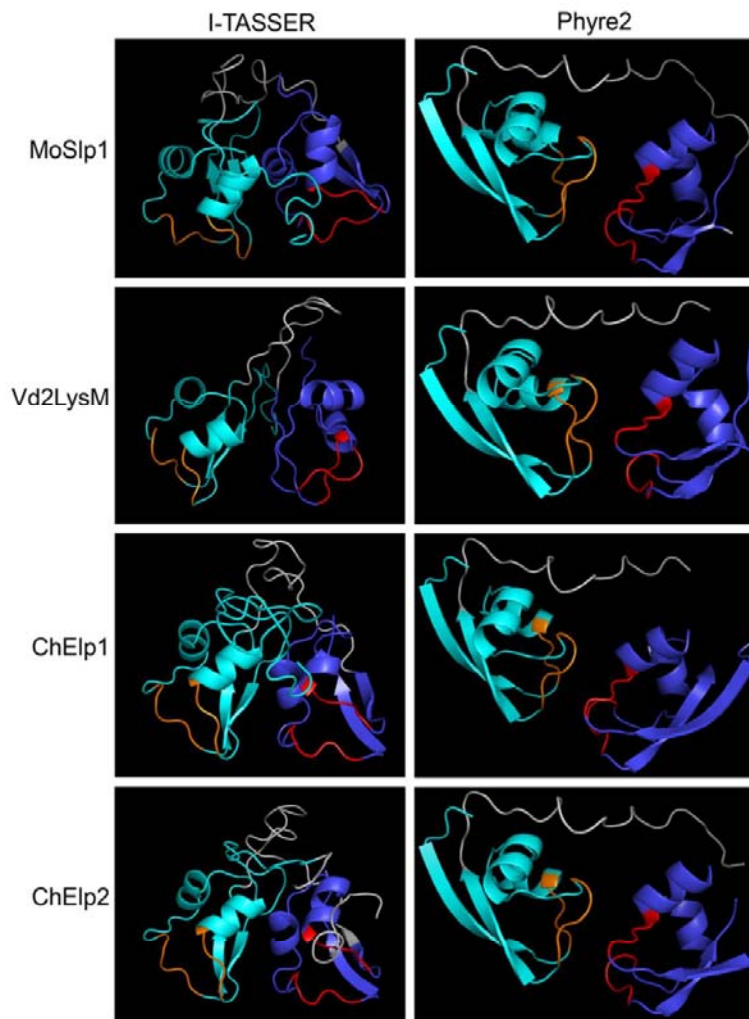

**Fig. 2** *In-silico* prediction of the three-dimensional structures of four LysM effectors with two LysM domains with I-TASSER and Phyre2 software. Residues proposed to be involved in chitin binding are indicated in orange and red. Structures were visualized using the PyMOL molecular graphics system (Schrodinger LLC, 2015).

142 MoSlp1 are facing inward and intramolecular LysM dimerization is possible by  
143 maximally stretching the linker in between the two LysM domains. However, for the

144 three additional LysM effectors Phyre2 is only able to allow intramolecular LysM  
145 dimerization by interrupting this linker domain, suggesting that intramolecular LysM  
146 dimerization is normally not possible. Thus, except for MoSlp1 for which the two  
147 software tools disagree, both tools agree that chitin binding through intramolecular  
148 dimerization is highly unlikely. Based on these predictions, we decided to further pursue  
149 investigations into the substrate-binding mechanisms of fungal effectors that contain  
150 two LysM domains.

151

### 152 **Heterologous LysM effector production**

153 The most direct method to reveal the chitin-binding mechanism of a LysM effector is by  
154 determination of a three-dimensional protein structure in the presence of chitin, for  
155 instance by X-ray crystallography. This strategy requires a protein crystal of sufficient  
156 size and quality to be used in an X-ray diffraction experiment, which in turn requires  
157 highly pure protein of a sufficiently high concentration. To this end, heterologous  
158 production of each of the LysM effectors as *N*-terminally 6×His-FLAG-tagged fusion  
159 protein was performed using *Pichia pastoris* as a yeast expression system. After  
160 purification from the culture filtrate, the LysM effectors were subjected to protein  
161 polyacrylamide gel analysis, revealing that only Vd2LysM migrated as expected based on  
162 its predicted molecular weight (Fig. 1AB). Interestingly, the three other proteins  
163 (MoSlp1, ChElp1 and ChElp2) migrated slower than expected based on their calculated  
164 molecular weights (Fig. 1AB), suggesting the presence of post-translational  
165 modifications, such as glycan decorations, on these proteins (Haltiwanger and Lowe,  
166 2004; Moremen *et al.*, 2012; Nagashima *et al.*, 2018; Xu and Ng, 2015). On the one hand,  
167 however, glycans can greatly hamper crystal packing since they may prevent or reduce  
168 favourable molecular contacts between protein molecules. Moreover, glycosylation may

169 cause microheterogeneity in protein solutions that affects protein ordering as well  
170 (Baker *et al.*, 1994; Davis *et al.*, 1993; Tang *et al.*, 2019). On the other hand, glycosylation  
171 may be explicitly required for proper protein folding and/or aid in crystal growth by  
172 forming critical intermolecular contacts and thus, does not *a priori* hinder  
173 crystallization(Mesters *et al.*, 2007).

174 To assess the potential for posttranslational modifications to occur on LysMs, we  
175 performed *N*-linked protein glycosylation site prediction. MoSlp1 was predicted to  
176 possess four potential glycosylation sites (N<sup>48</sup>DT, N<sup>94</sup>IS, N<sup>130</sup>LS and N<sup>104</sup>NT) on four  
177 asparagine residues (Asn, N) that match the glycosylation consensus sequence Asn-Xaa-  
178 Ser/Thr (N-X-S/T), where X can be any amino acid except proline (Pro, P) or glutamate  
179 (Glu, E) (Fig. 1C). ChElp1 as well as ChElp2 contains only a single potential glycosylation  
180 site, namely N<sup>105</sup>TS and N<sup>111</sup>TS, respectively (Fig. 1C). Consistent with our protein  
181 polyacrylamide gel electrophoresis observation, Vd2LysM is not predicted to possess  
182 any glycosylation site (Fig. 1C). These predictions were matched by a glycoprotein  
183 staining assay, revealing that Vd2LysM is the only one out of the four proteins that does  
184 not react with the dye (Fig. S2), and confirming that MoSlp1, ChElp1 and ChElp2 were  
185 indeed glycosylated during yeast production.

186 In an attempt to increase protein homogeneity and possibly promote  
187 crystallization success, enzymatic deglycosylation was pursued based on mannosidase  
188 treatment. However, treatment of MoSlp1 and ChElp2 with mannosidase failed to  
189 decrease the observed molecular weights of the proteins in polyacrylamide gel analysis  
190 (Fig. 3), suggesting that high-mannose-type N-glycans do not form the most important  
191 glycan decorations on these proteins. To further pursue enzymatic deglycosylation of  
192 the LysM proteins, the peptide:N-glycosidase F (PNGase F) amidase that cleaves  
193 between the innermost GlcNAc and asparagine residues of high mannose, hybrid, and

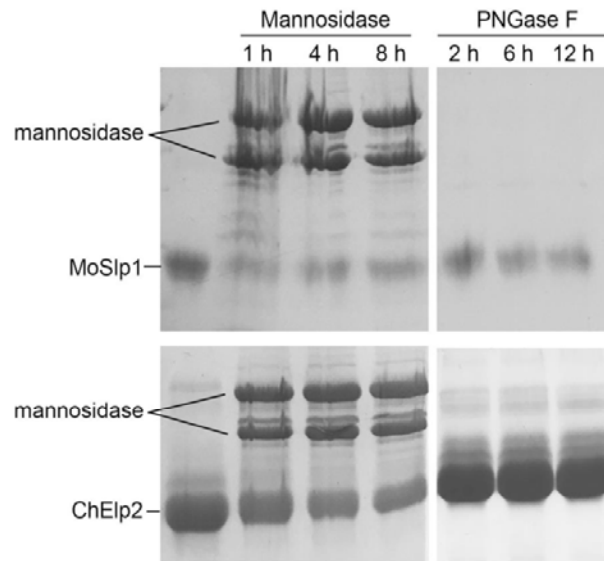

**Fig. 3 Treatment of the *P. pastoris*-produced LysM effectors MoSlp1 and ChElp2 with mannosidase and PNGase F in an attempt to remove putative *N*-glycans.** Polyacrylamide gel electrophoresis of the LysM effectors MoSlp1 (top panels) and ChElp2 (bottom panels) after incubation with mannosidase (left panels) and PNGase F (right panels). Protein samples were collected at different time points after incubation and subjected to gel electrophoresis followed by CBB staining.

194 complex oligosaccharides from N-linked glycoproteins was used on MoSlp1 and ChElp2.

195 Unfortunately, also this treatment did not decrease the observed molecular weights (Fig.

196 3).

197 As an alternative strategy to reduce glycosylation of the protein preparations,  
198 site-directed mutagenesis was conducted on *ChElp1* and *ChElp2* such that the  
199 asparagines in the single potential glycosylation sites, N<sup>105</sup> and N<sup>111</sup> respectively, were  
200 replaced by glutamines (Gln, Q). Unfortunately, however, production of the mutated  
201 proteins failed repeatedly due to protein instability. As we have previously successfully  
202 crystallized Ecp6 protein that was produced in the same manner despite containing two  
203 spatially close glycosylation sites that were indeed found to be glycosylated in the  
204 crystal structure (Sanchez-Vallet *et al.*, 2013), we decided to arrest our efforts to prevent  
205 glycosylation of the proteins.

206

### 207 **Solubility and homogeneity of the LysM protein preparations**

208 Since the isoelectric point (pI) is an important indicator of protein solubility, the pI of  
209 the four proteins was calculated. Whereas MoSlp1, ChElp1 and ChElp2 were determined  
210 to be acidic proteins with pI of 4.48, 3.73 and 4.64, respectively, Vd2LysM was calculated  
211 to have a rather neutral pI of 7.76. Based on the pIs, all four LysM proteins were  
212 dissolved in a buffer with pH 8.5 (20 mM Tris, 150 mM NaCl, 5% glycerol), and  
213 concentrated (>7 mg/mL) without occurrence of visible precipitation (Table S1).

214 Next, dynamic light scattering (DLS) was employed to determine the molecular  
215 homogeneity of the protein solutions (Dessau and Modis, 2011; Proteau *et al.*, 2010).  
216 The DLS heatmaps exhibited extremely heterogenous particle size distributions for each  
217 of the LysM proteins. In particular, the particle size distribution for MoSlp1 and ChElp2  
218 was quite heterogenous and ranged from 10 nm to 100 nm (Fig. 4A), which is  
219 significantly larger than the expected size of 1-3 nm for a protein with a molecular  
220 weight of approximately 16 kDa. Although less heterogenous, ChElp1 mostly occurred as

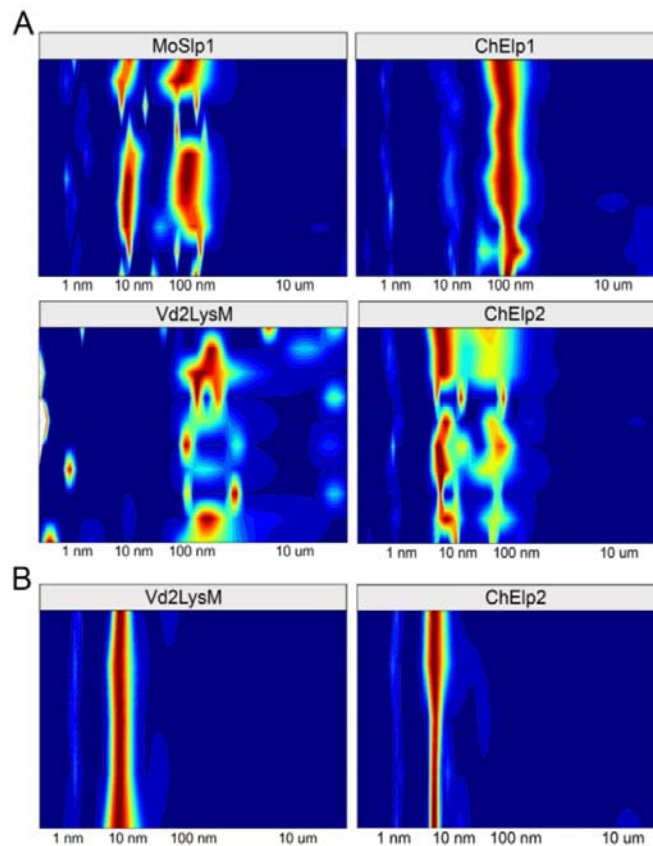

**Fig. 4 Particle size distribution of four LysM effectors as measured by dynamic light scattering (DLS).** The particle size distribution is shown as a colour scale heat map ranging from blue (lowest abundance) to red (highest abundance) for a particle size range of 1 nm to 100  $\mu$ m. (A) Heat maps of the four *Pichia pastoris*-produced LysM effectors after initial purification and concentration. (B) Heat maps of Vd2LysM and ChElp2 after gel filtration and decyl  $\beta$ -D-maltopyranoside (DM) treatment.

221 particles of around at 100 nm, which again points towards a significant degree of  
222 aggregation (Fig. 4A). Finally, Vd2LysM occurred as a heterogenous population of

223 particles of 100 nm and larger. The heterogeneity of the four protein preparations  
224 together with the relatively large particle size is likely to negatively impact crystal  
225 formation (Niesen *et al.*, 2008; Price 2nd *et al.*, 2009).

226 In order to improve protein solubility and particle size distribution, gel filtration  
227 and mild detergent treatment were pursued for all four LysM effectors. However,  
228 eventually, we only successfully improved the homogeneity of Vd2LysM and ChElp2 by  
229 gel filtration combined with the treatment with the nonionic detergent decyl  $\beta$ -D-  
230 maltopyranoside (DM). These protein samples were tested by DLS, which revealed  
231 uniform particle distributions for both proteins with main molecular populations at  
232 around 10 nm (Fig. 4B). Therefore, both protein preparations were used for  
233 crystallization screenings.

234

### 235 **Attempts to obtain protein crystals failed for all four LysM effectors**

236 Primary protein crystallization is a screening experiment where a concentrated solution  
237 of target protein is subjected to a variety of conditions that cover a wide range of buffers,  
238 salts, precipitating agents, pH, additives and even ligands (Bergfors, 2009; Chayen and  
239 Saridakis, 2008; Skarina *et al.*, 2014). The ultimate aim is to reach a protein's supersaturation  
240 state, where protein molecules may self-assemble into a periodically repeating pattern that  
241 extends in three dimensions, yielding protein crystals. For protein crystallization, there is  
242 no systematic analysis or comprehensive theory to guide efforts to directions that can  
243 increase the success rate. Consequently, macromolecular crystal growth largely remains  
244 empirical (McPherson and Gavira, 2014). Both structures of *C. fulvum* Ecp6 and *Z. tritici*  
245 Mg1LysM were determined using protein crystals obtained from *P. pastoris*-produced  
246 protein preparations without additional chitin treatment. However, chitin molecules were  
247 found to be already present in the Ecp6 and Mg1LysM crystals, suggesting that they were



248 derived from the cell wall of yeast. In this study, four *P. pastoris*-produced LysM proteins  
249 were directly subjected to initial screening using commercial crystallization kits PACT  
250 premier™, Salt<sup>RX</sup>, Index™, PEG<sup>RX</sup> and PEG/Ion screen (96 conditions/kit) with the  
251 original concentrations (Table S1). Because we observed instant heavy precipitations in  
252 more than half of the conditions, the four LysM protein preparations were diluted to half  
253 the original concentrations and subjected to the initial screening again. Unfortunately,  
254 none of these attempts yielded any genuine protein crystals. Subsequently, we pre-  
255 incubated the LysM proteins with chitinhexaose in molar ratios of 3:1 and 1:1  
256 (protein:chitin) and subjected them to the initial crystallization screening again.  
257 However, even after one year, none of the conditions developed genuine protein crystals.

258 To promote crystallization, active small molecules, traditionally referred to as  
259 “additives”, can be added to promote the formation of favourable lattice contacts (McPherson  
260 *et al.*, 2011; McPherson and Cudney, 2006). Therefore, we conducted further screenings by  
261 adding 96 additives into two different buffers, namely i) 0.1 M HEPES, 30% PEG 3350, pH 7.0;  
262 ii) 50% Tacsimate, which is a mixture of organic acids with pH 7.0, for all four LysM proteins  
263 at their original concentrations as well as at half-diluted concentrations. Unfortunately, none  
264 of these attempts yielded any genuine protein crystals.

265 Finally, Vd2LysM and ChElp2 were produced in *E. coli* and subjected to an initial  
266 screening in the absence of exogenously added chitin and after pre-treatment with  
267 chitinhexaose in molar ratios of 3:1 and 1:1 (protein:chitin) using the five commercial kits,  
268 and also subjected to the additive screen kit in the two different buffers. Unfortunately, also  
269 these attempts were in vain.



270

### 271 **Chitin-induced polymerisation suggests intramolecular LysM dimerization**

272 As all our crystallization attempts for the four different LysM effectors failed, we  
273 pursued other strategies to provide evidence for the occurrence of either inter- or  
274 intramolecular LysM dimerization. We reasoned that treatment with chitin oligomers  
275 would lead to higher order oligomeric or polymeric protein complexes if intermolecular  
276 LysM dimerization occurs (Fig. 5, hypothesis I), while such complexes will not be formed  
277 in case of intramolecular LysM dimerization (Fig. 5, hypothesis II). To address these  
278 hypotheses, ChElp2 was selected as a representative and was expressed in *Escherichia*  
279 *coli* to obtain protein that is devoid of chitin. After purification and concentration, the  
280 aggregation status of the two protein preparations was tested with DLS. Interestingly,  
281 the addition of chitin resulted in a clear shift in particle size distribution in a  
282 concentration-dependent manner. Whereas a 3:1 protein:chitin molecular ratio shifted  
283 the particle size distribution of ChElp2 towards larger complexes of 10 nm to 100 nm  
284 (Fig. 6), further addition of chitin to a protein:chitin ratio of 1:1 fully shifted the  
285 dominant ChElp2 particle size towards 100 nm (Fig. 6). This finding strongly suggests  
286 that chitin addition mediates intermolecular LysM dimerization, leading to the  
287 formation of polymeric protein complexes.

288 As a second, independent line of evidence for polymerization, we hypothesized  
289 that if ChElp2 undergoes chitin-induced polymerization, we should be able to precipitate  
290 polymeric complexes during centrifugation. Thus, with Ecp6 as a negative control, we  
291 incubated ChElp2 overnight with chitohexaose and subsequently centrifuged the  
292 samples at 20,000 g in the presence of 0.002% methylene blue to visualize the protein.  
293 Indeed, a clear protein pellet appeared when ChElp2 was incubated with chitin, but not  
294 in the control treatment without chitin, nor in the Ecp6 samples (Fig. 7). Next, we

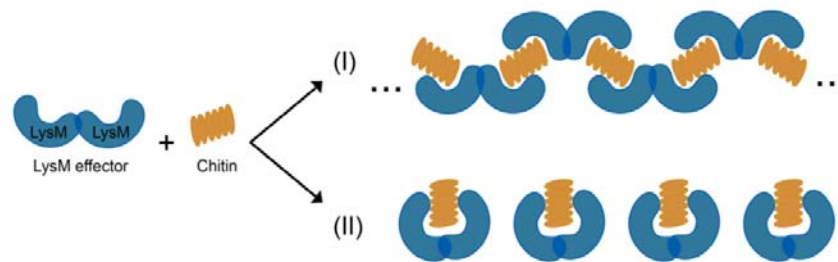

**Fig. 5 Two hypotheses for chitin binding by fungal effectors containing two LysM domains.** LysM effectors that contain two LysMs may bind chitin through (I) intermolecular dimerization, which should not lead to polymerisation, or through (II) intramolecular dimerization, in which LysM effectors may undergo ligand-induced polymerization.

295 assessed whether a similar precipitation in the presence of chitin, as evidence for  
296 polymerisation, could be obtained for MoSlp1 and Vd2LysM as well. Indeed, this appeared

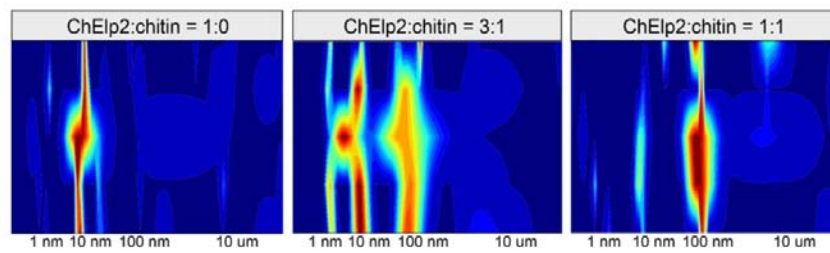

**Fig. 6 Particle size distribution of ChElp2 in absence and presence of chitin as measured by dynamic light scattering (DLS).** The particle size distribution is shown as a colour scale heat map ranging from blue (lowest abundance) to red (highest abundance) for a particle size range of 1 nm to 100 μM.

297 to be the case (Fig. 7). Collectively, these data confirm the occurrence of chitin-induced  
298 polymerisation of LysM effectors that comprise two LysMs, and prove that

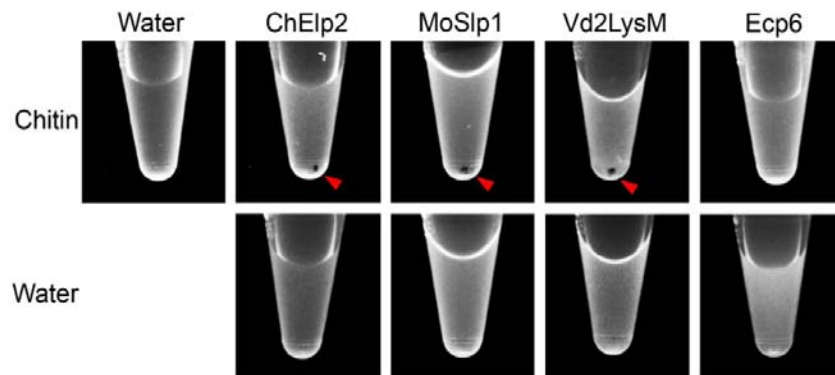

**Fig. 7 Chitin-induced polymerization of LysM effectors with two LysM domains.** The LysM effector proteins ChElp2, MoSlp1 and Vd2LysM, together with Ecp6 as negative control, were incubated with chitohexaose (chitin) or water. After overnight incubation, methylene blue was added and protein solutions were centrifuged, resulting in protein pellets (red arrowheads) as a consequence of polymerization for ChElp2, MoSlp1 and Vd2LysM, but not for Ecp6.

299 intermolecular dimerization (Fig. 5, hypothesis I) rather than intramolecular  
300 dimerization (Fig. 5, hypothesis II) occurs in the presence of chitin.

301

302

303 **DISCUSSION**

304 To address the question whether LysM effectors that comprise two LysM domains bind  
305 chitin through inter- or intramolecular dimerization, we heterologously expressed four  
306 such LysM proteins and pursued the determination of 3D-protein structures based on X-  
307 ray crystallography. We screened the four *P. pastoris*-produced LysM effectors in two  
308 different concentrations with five different commercial kits that amount to a total of 480  
309 conditions, in absence and presence of chitin in two different ratios, as well as with an  
310 additive screening in two different buffers with a total of 192 conditions. Moreover, for  
311 Vd2LysM and ChElp2, *E. coli*-produced protein was screened under the above-  
312 mentioned conditions as well. Although we tested this large amount of conditions on  
313 four homologous proteins, no protein crystals developed. Generally, if crystallization of a  
314 protein fails, it can be attributed to many factors, ranging from insufficient purity and  
315 homogeneity of the protein, to the fact that some proteins are simply naturally or  
316 biologically unable to crystallize (Dessau and Modis, 2011; Wlodawer *et al.*, 2017). In this  
317 study, we tried to address as many factors with respect to protein quality as possible,  
318 but our attempts to obtain protein crystals failed nonetheless.

319 Obviously, absence of crystal formation does not prove that crystal formation is  
320 impossible. However, the lack of crystal formation inspired our further thoughts about  
321 LysM effector chitin binding. Theoretically, we anticipated that two possible substrate-  
322 binding mechanisms may occur for our LysM effectors (Fig. 5): chitin binding through  
323 inter- (hypothesis I) or intramolecular (hypothesis II) chitin binding. If intramolecular  
324 chitin binding would occur, it can be expected that chitin molecules reduce protein  
325 flexibility and promote protein homogeneity in solution, theoretically promoting crystal  
326 formation. However, arguably, if intermolecular chitin binding is prevalent,  
327 polymerization is likely to occur, which may involve chains of polymers of variable

328 lengths. As a consequence, homogeneity in protein solution may be severely  
329 compromised, leading to precipitation rather than to crystallization. The finding that  
330 exogenously added chitin can induce the formation of oligomeric complexes of ChElp2 as  
331 determined in DLS experiments (Fig. 6) suggested that oligomers indeed occur, pointing  
332 towards the occurrence of intermolecular dimerization as proposed in hypothesis I (Fig.  
333 5). However, solid proof was subsequently obtained by performing centrifugation  
334 experiments upon incubation with chitin hexamers, revealing that protein pellets as a  
335 consequence of chitin-induced polymerisation were obtained not only for ChElp2, but  
336 also for MoSlp1 and VdLysM2 (Fig. 7). The finding that such pellets were not obtained  
337 with Ecp6 is important, as it demonstrates that the pellets are associated with  
338 intermolecular dimerization of LysM effector molecules, a process that is not supposed  
339 to occur with Ecp6 that undergoes intramolecular LysM dimerization (Sanchez-Vallet *et*  
340 *al.*, 2013).

341         The initial prediction of the three-dimensional protein structures with I-TASSER  
342 as well as with Phyre2 could not support the occurrence of intramolecular dimerization  
343 of LysMs to mechanistically explain chitin binding by LysM effectors that comprise two  
344 LysMs. Our experimental evidence further supports this notion. Taken together, we  
345 propose that fungal LysM effectors that comprise two LysM domains bind chitin through  
346 intermolecular dimerization, contributing to fungal virulence through formation of  
347 polymeric complexes that have the propensity to precipitate in order to eliminate the  
348 presence of chitin oligomers at infection sites that may otherwise alarm the host  
349 immune system.

350

## 351 **MATERIALS AND METHODS**

### 352 **Sequence alignment and three-dimensional protein structure prediction**

353 LysM domains of proteins were predicted by InterPro (<https://www.ebi.ac.uk/interpro/>;  
354 Finn *et al.*, 2017) and the alignment of amino acid sequences was performed by  
355 ClustalX2. Protein structures were predicted with I-TASSER  
356 (<https://zhanglab.ccmb.med.umich.edu/I-TASSER/>; Roy *et al.*, 2010) and with Phyre2  
357 (<http://www.sbg.bio.ic.ac.uk/~phyre2/html/page.cgi?id=index>; Kelley *et al.*, 2015).  
358 Structures were viewed by the PyMOL molecular graphics system, version 2  
359 (Schrodinger LLC, 2015).

360

### 361 **Heterologous protein production in *Pichia pastoris***

362 Protein sequences were analysed using SignalP4.0  
363 (<http://www.cbs.dtu.dk/services/SignalP/>; Petersen *et al.*, 2011) and the coding  
364 sequences of mature proteins without signal peptide were amplified with primers listed  
365 in Table S2, fused with an N-terminal 6×His-tag and cloned into expression vector pPIC9  
366 (Thermo Fisher Scientific, California, USA). Correctness of the resulting constructs was  
367 confirmed by DNA sequencing prior to introduction into *Pichia pastoris* strain GS115  
368 (Thermo Fisher Scientific, California, USA). Fermentation was conducted in  
369 approximately 3 L of culture in a bioreactor BioFlo120 (Eppendorf, Hamburg, Germany)  
370 at 30°C for 5 days, including 3 days of methanol induction. Next, *P. pastoris* cells were  
371 pelleted by centrifugation at 3800 g at 4°C for 50 min and the supernatant was  
372 concentrated to 200 ml using a Vivaflow 200 Cross Flow Cassette (5000NWCO; Sartorius,  
373 Göttingen, Germany) at 4°C for approximately 20 h. The concentrated supernatant was  
374 purified using His60 Ni Superflow resin (TaKaRa, California, USA) on a BioLogic LP  
375 system (Bio-Rad, California, USA). Purified protein was analysed by protein



376 polyacrylamide gel electrophoresis followed by staining with Coomassie Brilliant Blue  
377 (CBB) and dialyzed against 5 L of 50 mM Tris, 150 mM NaCl to remove imidazole. Finally,  
378 proteins were further concentrated using Amicon Ultra-15 Centrifugal Filter Units  
379 (MERCK, Carrigtohill, Ireland) and stored at -20°C.

380

### 381 **Heterologous protein production in *E. coli***

382 Coding sequences of mature proteins without signal peptide were amplified with  
383 primers listed in Table S2 and cloned into expression vector pETSUMO (Thermo Fisher  
384 Scientific, Massachusetts, USA). Correctness of the resulting constructs pETSUMO-  
385 ChElp2 and pETSUMO-Vd2LysM were confirmed by DNA sequencing and introduced  
386 into *E. coli* strains BL21 and Origami, respectively. Both proteins were produced at 28°C  
387 with 0.2 mM IPTG. Cell culture was pelleted by centrifugation at 4000 g for 40 min at 4°C,  
388 and the pellet was resuspended in 20 mL lysis buffer (Table S2), shaken at 4°C for at  
389 least two hours and centrifuged at 10,000 g for 1 h. The supernatant was collected and  
390 purified using His60 Ni Superflow resin (TaKaRa, California, USA) on a BioLogic LP  
391 system (Bio-Rad, California, USA). The resulting protein was dialyzed 3 L of 20 mM Tris,  
392 150 mM NaCl, 5 % glycerol, pH 8.0 while 5 µL of cleavage protein ULP1 was added into  
393 the dialysis membrane to cleave-off the 6×His-SUMO tag. Next day, protein solution was  
394 collected and subjected to purification using His60 Ni Superflow resin (TaKaRa,  
395 California, USA) to remove 6×His-SUMO tag from the protein preparations. Eventually,  
396 LysM proteins were dissolved in 20 mM Tris, 150 mM NaCl, 5% glycerol, pH 8.0 and  
397 concentrated to a high concentration.

398

399 **Glycoprotein staining assay**

400 1  $\mu$ L of concentrated LysM protein solution was tested using a protein polyacrylamide  
401 gel followed by CBB and glycoprotein staining with the Pierce Glycoprotein Staining Kit  
402 (Thermo Fisher Scientific, California, USA) according to the manufacturer's instructions,  
403 including the addition of horseradish peroxidase and soybean trypsin inhibitor as  
404 positive and negative control, respectively.

405

406 **Mannosidase and PNGase F treatments**

407 Deglycosylation was conducted with  $\alpha$ -Mannosidase from *Canavalia ensiformis* (MERCK,  
408 New Jersey, USA) and PNGase F (MERCK, New Jersey, USA) according to the  
409 manufacturer's instructions. 5  $\mu$ l of concentrated LysM protein solution was treated  
410 with 10  $\mu$ l of  $\alpha$ -mannosidase (1 mg/ml, pH 4.5) at 25°C or 1  $\mu$ l PNGase F (one unit, pH 7.5)  
411 at 37°C. Protein samples were collected after 1, 4 and 8 h of incubation for  $\alpha$ -  
412 mannosidase treatment, and after 2, 6 and 12 h of incubation for PNGase F treatment.  
413 Subsequently, protein samples were analysed using protein polyacrylamide gel  
414 electrophoresis followed by CBB staining.

415

416 **Crystallization conditions**

417 Commercial kits PACT premier™ (Molecular dimensions, Sheffield, UK) and Salt<sup>RX</sup>,  
418 Index™, Shotgun, PEG<sup>RX</sup>, PEG/Ion screen (Hampton Research, California, USA) were  
419 used for initial screening. 96-well protein crystallization plates were prepared using a  
420 Crystal Phoenix robot (Art Robbins Instruments, California, USA). Chitohexaose  
421 (Megazyme, Wicklow, Ireland) was added in molar ratios of 3:1 and 1:1. The additive  
422 screening was conducted using the Additive Screen HR2-428 (Hampton Research,

423 California, USA) and Tacsimate pH 7.0 (Hampton Research, California, USA) according to  
424 the manufacturer's instructions.

425

#### 426 **Dynamic light scattering (DLS) measurements**

427 LysM proteins were dialyzed overnight against 100 mM NaCl and used for particle size  
428 distribution measurement using a SpectroSize 300 machine (Xtal Concepts, Hamburg,  
429 Germany). For the chitin-induced polymerization measurements, proteins were  
430 dissolved in 20 mM Tris, 150 mM NaCl, pH 8.0 and treated with 0.1 % Triton X-100.  
431 Chitohexaose (Megazyme, Wicklow, Ireland) was added in molar ratios of 1:1 and 1:2  
432 (protein:chitin) and incubated for 4 hours.

433

#### 434 **Polymerization assay**

435 LysM effector proteins were adjusted to a concentration of 200  $\mu$ M and 200  $\mu$ L of each  
436 protein was incubated with 200  $\mu$ L of 2 mM chitohexaose (Megazyme, Wicklow, Ireland),  
437 or 200  $\mu$ L water as control, at room temperature overnight. The next day, 2  $\mu$ L of 0.2%  
438 methylene blue (Sigma-Aldrich, Missouri, USA) was added and incubated for 30 min  
439 after which protein solutions were centrifuged at 20,000 g for 15 min. Photos were  
440 taken with a ChemiDoc MP system (Bio-Rad, California, USA) with custom setting for  
441 RFP.

442

#### 443 **ACKNOWLEDGEMENT**

444 H. Tian acknowledges receipt of a PhD fellowship from the China Scholarship Council  
445 (CSC). Work in the laboratory of B.P.H.J. Thomma is supported by the Research Council  
446 for Earth and Life Science (ALW) of the Netherlands Organization for Scientific Research  
447 (NWO) and by the Deutsche Forschungsgemeinschaft (DFG, German Research

448 Foundation) under Germany's Excellence Strategy – EXC 2048/1 – Project ID:  
449 390686111. The authors acknowledge support from the partners of the European  
450 Research Area Network for Coordinating Action in Plant Sciences (ERA-CAPS)  
451 consortium "SIPIS".

452

#### 453 **AUTHOR CONTRIBUTIONS**

454 HT, JRM, BPHJT conceived the study; HT designed experiments; HT, GLF and AK  
455 performed experiments; HT analyzed data and wrote the manuscript; JRM and BPHJT  
456 supervised the project; all authors discussed the results and contributed to the final  
457 manuscript.

458

#### 459 **CONFLICT OF INTEREST**

460 The authors declare no conflict of interest exists.

461 **FIGURE LEGENDS**

462 **Fig. 1 Characteristics and heterologous production of four LysM effectors.** (A)

463 Schematic representation of four fungal LysM effectors that contain two LysM domains.

464 Signal peptides (grey boxes) were predicted with SignalP 4.0

465 (<http://www.cbs.dtu.dk/services/SignalP-4.0/>) and LysM domains (green boxes) with

466 InterPro (<https://www.ebi.ac.uk/interpro/>). The numbers in the boxes indicate the

467 amino acids that compose the motif. (B) Protein polyacrylamide gel electrophoresis of 1

468  $\mu$ l of purified and concentrated preparation of the effectors produced in *Pichia pastoris*

469 followed by CBB staining. (C) Primary amino acid sequence of the four LysM effectors

470 with signal peptides in bold, LysMs underlined, and putative *N*-glycosylation sites as

471 predicted with the NetNGlyc 1.0 Server (<http://www.cbs.dtu.dk/services/NetNGlyc/>) in

472 blue. *N*-glycosylation sites are composed of asparagine-X-Serine/Threonine (N-X-S/T)

473 triads, with the asparagines that may be *N*-glycosylated in bold.

474

475 **Fig. 2 *In-silico* prediction of the three-dimensional structures of four LysM**

476 **effectors with two LysM domains with I-TASSER and Phyre2 software.** Residues

477 proposed to be involved in chitin binding are indicated in orange and red. Structures

478 were visualized using the PyMOL molecular graphics system (Schrodinger LLC, 2015).

479

480 **Fig. 3 Treatment of the *P. pastoris*-produced LysM effectors MoSlp1 and ChElp2**

481 **with mannosidase and PNGase F in an attempt to remove putative *N*-glycans.**

482 Polyacrylamide gel electrophoresis of the LysM effectors MoSlp1 (top panels) and

483 ChElp2 (bottom panels) after incubation with mannosidase (left panels) and PNGase F

484 (right panels). Protein samples were collected at different time points after incubation

485 and subjected to gel electrophoresis followed by CBB staining.

486

487 **Fig. 4 Particle size distribution of four LysM effectors as measured by dynamic**  
488 **light scattering (DLS).** The particle size distribution is shown as a colour scale heat  
489 map ranging from blue (lowest abundance) to red (highest abundance) for a particle size  
490 range of 1 nm to 100  $\mu$ M. (A) Heat maps of the four *Pichia pastoris*-produced LysM  
491 effectors after initial purification and concentration. (B) Heat maps of Vd2LysM and  
492 ChElp2 after gel filtration and decyl  $\beta$ -D-maltopyranoside (DM) treatment.

493

494 **Fig. 5 Two hypotheses for chitin binding by fungal effectors containing two LysM**  
495 **domains.** LysM effectors that contain two LysMs may bind chitin through (I)  
496 intermolecular dimerization, which should not lead to polymerisation, or through (II)  
497 intramolecular dimerization, in which LysM effectors may undergo ligand-induced  
498 polymerization.

499

500 **Fig. 6 Particle size distribution of ChElp2 in absence and presence of chitin as**  
501 **measured by dynamic light scattering (DLS).** The particle size distribution is shown  
502 as a colour scale heat map ranging from blue (lowest abundance) to red (highest  
503 abundance) for a particle size range of 1 nm to 100  $\mu$ M.

504

505 **Fig. 7 Chitin-induced polymerization of LysM effectors with two LysM domains.**  
506 The LysM effector proteins ChElp2, MoSlp1 and Vd2LysM, together with Ecp6 as  
507 negative control, were incubated with chitohexaose (chitin) or water. After overnight  
508 incubation, methylene blue was added and protein solutions were centrifuged, resulting  
509 in protein pellets (red arrowheads) as a consequence of polymerization for ChElp2,  
510 MoSlp1 and Vd2LysM, but not for Ecp6.

## Parsed Citations

- Altenbach, D. and Robatzek, S. (2007)** Pattern recognition receptors: from the cell surface to intracellular dynamics. *Mol. Plant-Microbe Interact.* **20**, 1031–1039.  
Pubmed: [Author and Title](#)  
Google Scholar: [Author Only](#) [Title Only](#) [Author and Title](#)
- Baker, H.M., Day, C.L., Norris, G.E. and Baker, E.N. (1994)** Enzymatic deglycosylation as a tool for crystallization of mammalian binding proteins. *Acta Crystallogr D Biol Crystallogr* **50**, 380–384.  
Pubmed: [Author and Title](#)  
Google Scholar: [Author Only](#) [Title Only](#) [Author and Title](#)
- Boller, T. and Felix, G. (2009)** Renaissance of elicitors: perception of microbe-associated molecular patterns and danger signals by pattern-recognition receptors. *Annu. Rev. Plant Biol.* **60**, 379–406.  
Pubmed: [Author and Title](#)  
Google Scholar: [Author Only](#) [Title Only](#) [Author and Title](#)
- Bolton, M.D., Esse, H.P. Van, Vossen, J.H., et al. (2008)** The novel *Cladosporium fulvum* lysin motif effector Ecp6 is a virulence factor with orthologues in other fungal species. *Mol. Microbiol.* **69**, 119–136.  
Pubmed: [Author and Title](#)  
Google Scholar: [Author Only](#) [Title Only](#) [Author and Title](#)
- Cao, Y., Liang, Y., Tanaka, K., Nguyen, C.T., Jedrzejczak, R.P., Joachimiak, A. and Stacey, G. (2014)** The kinase LYK5 is a major chitin receptor in *Arabidopsis* and forms a chitin-induced complex with related kinase CERK1. *Elife* **3**, e03766.  
Pubmed: [Author and Title](#)  
Google Scholar: [Author Only](#) [Title Only](#) [Author and Title](#)
- Cen, K., Li, B., Lu, Y., Zhang, S. and Wang, C. (2017)** Divergent LysM effectors contribute to the virulence of *Beauveria bassiana* by evasion of insect immune defenses. *PLOS Pathog.* **13**, e1006604.  
Pubmed: [Author and Title](#)  
Google Scholar: [Author Only](#) [Title Only](#) [Author and Title](#)
- Chayen, N.E. and Saridakis, E. (2008)** Protein crystallization: from purified protein to diffraction-quality crystal. *Nat. Methods* **5**, 147–153.  
Pubmed: [Author and Title](#)  
Google Scholar: [Author Only](#) [Title Only](#) [Author and Title](#)
- Davis, S.J., Puklavec, M.J., Ashford, D.A., Harlos, K., Jones, E.Y., Stuart, D.I. and Williams, A.F. (1993)** Expression of soluble recombinant glycoproteins with predefined glycosylation: application to the crystallization of the T-cell glycoprotein CD2. *Protein Eng* **6**, 229–232.  
Pubmed: [Author and Title](#)  
Google Scholar: [Author Only](#) [Title Only](#) [Author and Title](#)
- Dessau, M.A. and Modis, Y. (2011)** Protein crystallization for X-ray crystallography. *J Vis Exp* **16**, 2285.  
Pubmed: [Author and Title](#)  
Google Scholar: [Author Only](#) [Title Only](#) [Author and Title](#)
- Dolfors, F., Holmquist, L., Dixelius, C. and Tzelepis, G. (2019)** A LysM effector protein from the basidiomycete *Rhizoctonia solani* contributes to virulence through suppression of chitin-triggered immunity. *Mol. Genet. Genomics* **294**, 1211–1218.  
Pubmed: [Author and Title](#)  
Google Scholar: [Author Only](#) [Title Only](#) [Author and Title](#)
- Felix, G., Regenass, M. and Boller, T. (1993)** Specific perception of subnanomolar concentrations of chitin fragments by tomato cells: Induction of extracellular alkalization, changes in protein phosphorylation, and establishment of a refractory state. *Plant J.* **4**, 307–316.  
Pubmed: [Author and Title](#)  
Google Scholar: [Author Only](#) [Title Only](#) [Author and Title](#)
- Finn, R.D., Attwood, T.K., Babbitt, P.C., et al. (2017)** InterPro in 2017-beyond protein family and domain annotations. *Nucleic Acids Res.* **45**, D190–D199.  
Pubmed: [Author and Title](#)  
Google Scholar: [Author Only](#) [Title Only](#) [Author and Title](#)
- Free, S.J. (2013)** Fungal cell wall organization and biosynthesis. *Adv. Genet.* **81**, 33–82.  
Pubmed: [Author and Title](#)  
Google Scholar: [Author Only](#) [Title Only](#) [Author and Title](#)
- Haltiwanger, R.S. and Lowe, J.B. (2004)** Role of glycosylation in development. *Annu. Rev. Biochem.* **73**, 491–537.  
Pubmed: [Author and Title](#)  
Google Scholar: [Author Only](#) [Title Only](#) [Author and Title](#)
- Jones, J.D.G. and Dangl, J.L. (2006)** The plant immune system. *Nature* **444**, 323–329.  
Pubmed: [Author and Title](#)  
Google Scholar: [Author Only](#) [Title Only](#) [Author and Title](#)

**Jonge, R. de, Peter van Esse, H., Kombrink, A., et al. (2010) Conserved Fungal LysM Effector Ecp6 Prevents Chitin-Triggered Immunity in Plants. *Science* (80-. ). 329, 953–955.**

Pubmed: [Author and Title](#)

Google Scholar: [Author Only Title Only Author and Title](#)

**Kelley, L.A., Mezulis, S., Yates, C.M., Wass, M.N. and Sternberg, M.J.E. (2015) The Phyre2 web portal for protein modeling, prediction and analysis. *Nat. Protoc.* 10, 845–858.**

Pubmed: [Author and Title](#)

Google Scholar: [Author Only Title Only Author and Title](#)

**Kombrink, A., Rovenich, H., Shi-Kunne, X., et al. (2017) *Verticillium dahliae* LysM effectors differentially contribute to virulence on plant hosts. *Mol. Plant Pathol.* 18, 596–608.**

Pubmed: [Author and Title](#)

Google Scholar: [Author Only Title Only Author and Title](#)

**Kombrink, A. and Thomma, B.P.H.J. (2013) LysM effectors: secreted proteins supporting fungal life. *PLOS Pathog.* 9, e1003769.**

Pubmed: [Author and Title](#)

Google Scholar: [Author Only Title Only Author and Title](#)

**Lenardon, M.D., Munro, C.A. and Gow, N.A. (2010) Chitin synthesis and fungal pathogenesis. *Curr. Opin. Microbiol.* 13, 416–423.**

Pubmed: [Author and Title](#)

Google Scholar: [Author Only Title Only Author and Title](#)

**Liu, T., Liu, Z., Song, C., et al. (2012) Chitin-induced dimerization activates a plant immune receptor. *Science* (80-. ). 336, 1160–1164.**

Pubmed: [Author and Title](#)

Google Scholar: [Author Only Title Only Author and Title](#)

**Marshall, R., Kombrink, A., Motteram, J., Loza-Reyes, E., Lucas, J., Hammond-Kosack, K.E., Thomma, B.P.H.J. and Rudd, J.J. (2011) Analysis of two in planta expressed LysM effector homologs from the fungus *Mycosphaerella graminicola* reveals novel functional properties and varying contributions to virulence on wheat. *Plant Physiol.* 156, 756–769.**

Pubmed: [Author and Title](#)

Google Scholar: [Author Only Title Only Author and Title](#)

**McPherson, A. and Cudney, B. (2006) Searching for silver bullets: an alternative strategy for crystallizing macromolecules. *J Struct Biol* 156, 387–406.**

Pubmed: [Author and Title](#)

Google Scholar: [Author Only Title Only Author and Title](#)

**McPherson, A. and Gavira, J.A. (2014) Introduction to protein crystallization. *Acta Crystallogr F Struct Biol Commun* 70, 2–20.**

Pubmed: [Author and Title](#)

Google Scholar: [Author Only Title Only Author and Title](#)

**McPherson, A., Nguyen, C., Cudney, R. and Larson, S.B. (2011) The role of small molecule additives and chemical modification in protein crystallization. *Cryst. Growth Des.* 11, 1469–1474.**

Pubmed: [Author and Title](#)

Google Scholar: [Author Only Title Only Author and Title](#)

**Mentlak, T.A., Kombrink, A., Shinya, T., et al. (2012) Effector-Mediated Suppression of Chitin-Triggered Immunity by *Magnaporthe oryzae* Is Necessary for Rice Blast Disease. *Plant Cell* 24, 322–335.**

Pubmed: [Author and Title](#)

Google Scholar: [Author Only Title Only Author and Title](#)

**Mesters, J.R., Henning, K. and Hilgenfeld, R. (2007) Human glutamate carboxypeptidase II inhibition: structures of GCP II in complex with two potent inhibitors, quisqualate and 2-PMPA. *Acta Crystallogr. D. Biol. Crystallogr.* 63, 508–513.**

Pubmed: [Author and Title](#)

Google Scholar: [Author Only Title Only Author and Title](#)

**Miya, A., Albert, P., Shinya, T., et al. (2007) CERK1, a LysM receptor kinase, is essential for chitin elicitor signaling in *Arabidopsis*. *Proc Natl Acad Sci U S A* 104, 19613–19618.**

Pubmed: [Author and Title](#)

Google Scholar: [Author Only Title Only Author and Title](#)

**Moremen, K.W., Tiemeyer, M. and Nairn, A. V. (2012) Vertebrate protein glycosylation: diversity, synthesis and function. *Nat. Rev. Mol. Cell Biol.* 13, 448–462.**

Pubmed: [Author and Title](#)

Google Scholar: [Author Only Title Only Author and Title](#)

**Nagashima, Y., Schaeuwen, A. von and Koiba, H. (2018) Function of N-glycosylation in plants. *Plant Sci.* 274, 70–79.**

Pubmed: [Author and Title](#)

Google Scholar: [Author Only Title Only Author and Title](#)

**Niesen, F.H., Koch, A., Lenski, U., Harttig, U., Roske, Y., Heinemann, U. and Peter, K. (2008) An approach to quality management in structural biology: Biophysical selection of proteins for successful crystallization. 162, 451–459.**

Pubmed: [Author and Title](#)

Google Scholar: [Author Only Title Only Author and Title](#)



**Petersen, T.N., Brunak, S., Heijne, G. von and Nielsen, H. (2011) SignalP 4.0: discriminating signal peptides from transmembrane regions. *Nat. Methods* 8, 785–786.**

Pubmed: [Author and Title](#)

Google Scholar: [Author Only](#) [Title Only](#) [Author and Title](#)

**Petutschnig, E.K., Jones, A.M.E., Serazetdinova, L., Lipka, U. and Lipka, V. (2010) The Lysin Motif Receptor-like Kinase (LysM-RLK) CERK1 is a major chitin-binding protein in *Arabidopsis thaliana* and subject to chitin-induced phosphorylation. *J. Biol. Chem.* 285, 28902–28911.**

Pubmed: [Author and Title](#)

Google Scholar: [Author Only](#) [Title Only](#) [Author and Title](#)

**Price 2nd, W.N., Chen, Y., Handelman, S.K., et al. (2009) Understanding the physical properties that control protein crystallization by analysis of large-scale experimental data. *Nat. Biotechnol.* 27, 51–57.**

Pubmed: [Author and Title](#)

Google Scholar: [Author Only](#) [Title Only](#) [Author and Title](#)

**Proteau, A, Shi, R. and Cygler, M. (2010) Application of dynamic light scattering in protein crystallization. *Curr Protoc Protein Sci* Chapter 17, Unit 17 10.**

Pubmed: [Author and Title](#)

Google Scholar: [Author Only](#) [Title Only](#) [Author and Title](#)

**Rovenich, H., Boshoven, J.C. and Thomma, B.P.H.J. (2014) Filamentous pathogen effector functions: Of pathogens, hosts and microbiomes. *Curr. Opin. Plant Biol.* 20, 96–103.**

Pubmed: [Author and Title](#)

Google Scholar: [Author Only](#) [Title Only](#) [Author and Title](#)

**Rovenich, H., Zuccaro, A. and Thomma, B.P. (2016) Convergent evolution of filamentous microbes towards evasion of glycan-triggered immunity. *New Phytol.* 212, 896–901.**

Pubmed: [Author and Title](#)

Google Scholar: [Author Only](#) [Title Only](#) [Author and Title](#)

**Roy, A, Kucukural, A. and Zhang, Y. (2010) I-TASSER: a unified platform for automated protein structure and function prediction. *Nat Protoc* 5, 725–738.**

Pubmed: [Author and Title](#)

Google Scholar: [Author Only](#) [Title Only](#) [Author and Title](#)

**Sanchez-Vallet, A, Mesters, J.R. and Thomma, B.P.H.J. (2015) The battle for chitin recognition in plant-microbe interactions. *FEMS Microbiol. Rev.* 39, 171–183.**

Pubmed: [Author and Title](#)

Google Scholar: [Author Only](#) [Title Only](#) [Author and Title](#)

**Sanchez-Vallet, A, Saleem-Batcha, R., Kombrink, A., Hansen, G., Valkenburg, D.J., Thomma, B.P.H.J. and Mesters, J.R. (2013) Fungal effector Ecp6 outcompetes host immune receptor for chitin binding through intrachain LysM dimerization. *Elife* 2, e00790.**

Pubmed: [Author and Title](#)

Google Scholar: [Author Only](#) [Title Only](#) [Author and Title](#)

**Sánchez-Vallet, A, Tian, H., Rodriguez-Moreno, L., et al. (2019) A secreted LysM effector protects fungal hyphae through chitin-dependent homodimer polymerization. *bioRxiv*, 787820.**

Pubmed: [Author and Title](#)

Google Scholar: [Author Only](#) [Title Only](#) [Author and Title](#)

**Schrodinger LLC (2015) The JyMOL Molecular Graphics Development Component, Version 1.8.,**

**Skarina, T., Xu, X., Evdokimova, E. and Savchenko, A (2014) High-throughput crystallization screening. *Methods Mol Biol* 1140, 159–168.**

Pubmed: [Author and Title](#)

Google Scholar: [Author Only](#) [Title Only](#) [Author and Title](#)

**Takahara, H., Hacquard, S., Kombrink, A., et al. (2016) *Colletotrichum higginsianum* extracellular LysM proteins play dual roles in appressorial function and suppression of chitin-triggered plant immunity. *New Phytol.* 211, 1323–1337.**

Pubmed: [Author and Title](#)

Google Scholar: [Author Only](#) [Title Only](#) [Author and Title](#)

**Tang, J., Sun, Y., Han, Z. and Shi, W. (2019) An illustration of optimal selected glycosidase for N-glycoproteins deglycosylation and crystallization. *Int J Biol Macromol* 122, 265–271.**

Pubmed: [Author and Title](#)

Google Scholar: [Author Only](#) [Title Only](#) [Author and Title](#)

**Wlodawer, A, Dauter, Z. and Jaskolski, M. (2017) Protein crystallography: methods and protocols. Humana Press 1607, 672.**

Pubmed: [Author and Title](#)

Google Scholar: [Author Only](#) [Title Only](#) [Author and Title](#)

**Xu, C. and Ng, D.T. (2015) Glycosylation-directed quality control of protein folding. *Nat. Rev. Mol. Cell Biol.* 16, 742–752.**

Pubmed: [Author and Title](#)

Google Scholar: [Author Only](#) [Title Only](#) [Author and Title](#)

**Yang, J. and Zhang, Y. (2015) I-TASSER server: new development for protein structure and function predictions. *Nucleic Acids Res.* 43, W174-81.**

Pubmed: [Author and Title](#)

Google Scholar: [Author Only](#) [Title Only](#) [Author and Title](#)

**Zeng, T., Rodriguez-Moreno, L., Mansurkhodzaev, A., et al. (2020) A lysin motif effector subverts chitin-triggered immunity to facilitate arbuscular mycorrhizal symbiosis. *New Phytol.* 225, 448–460.**

Pubmed: [Author and Title](#)

Google Scholar: [Author Only](#) [Title Only](#) [Author and Title](#)

**Zhang, X.-C., Wu, X., Findley, S., Wan, J., Libault, M., Nguyen, H.T., Cannon, S.B. and Stacey, G. (2007) Molecular Evolution of Lysin Motif-Type Receptor-Like Kinases in Plants. *Plant Physiol.* 144, 623–636.**

Pubmed: [Author and Title](#)

Google Scholar: [Author Only](#) [Title Only](#) [Author and Title](#)

**Zipfel, C. (2008) Pattern-recognition receptors in plant innate immunity. *Curr. Opin. Immunol.* 20, 10–16.**

Pubmed: [Author and Title](#)

Google Scholar: [Author Only](#) [Title Only](#) [Author and Title](#)

## **SUPPORTING INFORMATION LEGENDS**
